# Supplementary material
Source: publisher site journal article supplement (https://www.degruyter.com/publication/journal_key/OPPHIL/downloadAsset/OPPHIL_CFP%20Nihilism%20Seen%20Through%20The%20Lens%20of%20Post-Continental%20Philosophy.pdf)
Supplement: Supplementary file 1 [file OPPHIL_CFP%20Nihilism%20Seen%20Through%20The%20Lens%20of%20Post-Continental%20Philosophy.pdf]

# NIHILISM SEEN THROUGH THE LENS OF POST-CONTINENTAL PHILOSOPHY

## DESCRIPTION

---

*Open Philosophy* invites submissions for the topical issue “Nihilism Seen Through the Lens of Post-Continental Philosophy”, edited by Halit Evrim Bayındır (Royal Holloway, University of London).

The Nietzsche-inspired overcoming of nihilism has arguably been the preeminent project of continental philosophy, at once uniting and differentiating various strands of phenomenology and post-structuralism. The power of the project lies in the way it integrates and grounds a variety of objectives such as the destruction of metaphysics, representational modes of thought, power relations, anthropocentrism, and academic philosophy. It is through thinking and living in a non-nihilistic manner that these objectives can be accomplished. However, it is questionable today if this anti-nihilistic orientation in thought still has the status of an ambitious project as found in the cases of Heidegger and Deleuze. On the contrary, nihilism tends to become an antiquated problem and the philosophical relevance of its overcoming seems to be increasingly downgraded. This is especially the case in what has been called “post-continental” currents such as non-philosophy, speculative realism, object-oriented ontology, accelerationism, afro-pessimism, and neo-rationalism, which, despite inheriting these objectives, either remained silent against the anti-nihilist core of continental philosophy or opposed it with provocative appropriations of nihilism. We might thereby say that nihilism is one of the important and relatively less discussed factors that determined the rupture beyond continental thought. Building on this indeterminate situation, this issue aims to reproblematised nihilism with the perspectives offered by these new intellectual developments. With this in mind, it is also an opportunity to have a fresh look not only at the continental philosophy and post-continental currents but also at the whole unfolding of nihilism in western and non-western intellectual and cultural history. The papers can cover topics as diverse as the origins of nihilism in German idealism, Russian literature, Eastern spiritual traditions, analytic and pragmatist philosophy, philosophy of science, radical political theory, psychoanalysis, feminism, and queer theory.

## HOW TO SUBMIT

---

Submissions will be collected from **October 1 to November 30, 2022**. There are no specific length limitations.

To submit an article for this topical issue, authors are asked to access the online submission system at: <http://www.editorialmanager.com/opphil/>

Please choose as article type: Nihilism.

Before submission the authors should carefully read over the Instruction for Authors, available at: [degruyter.com/publication/journal\\_key/OPPHIL/downloadAsset/OPPHIL\\_Instruction%20for%20Authors.pdf](http://degruyter.com/publication/journal_key/OPPHIL/downloadAsset/OPPHIL_Instruction%20for%20Authors.pdf)

All contributions will undergo critical review before being accepted for publication.

Because Open Philosophy is published under the Open Access model, as a rule, publication costs should be covered by so-called Article Publishing Charges (APC), paid by authors, their affiliated institutions, funders or sponsors.

Authors without access to publishing funds are encouraged to discuss potential discounts or waivers with Managing Editor of the journal **Katarzyna Tempczyk** ([katarzyna.tempczyk@degruyter.com](mailto:katarzyna.tempczyk@degruyter.com)) before submitting their manuscripts.

Further questions about this thematic issue can be addressed to **Halit Evrim Bayındır** ([Evrin.Bayindir.2020@live.rhul.ac.uk](mailto:Evrin.Bayindir.2020@live.rhul.ac.uk)). In case of technical or financial questions, please contact the Managing Editor of the journal, **Katarzyna Tempczyk** [katarzyna.tempczyk@degruyter.com](mailto:katarzyna.tempczyk@degruyter.com)
